# Supplementary material for: Micellar catalysis on the electron transfer reactions of iron(iii)-polypyridyl complexes with organic sulfides—importance of hydrophobic interactions
Source: Royal Society of Chemistry journal article supplement (doi:10.1039/b509761d), 2005-12-12
Supplement: b509761d.pdf [file b509761d.pdf]

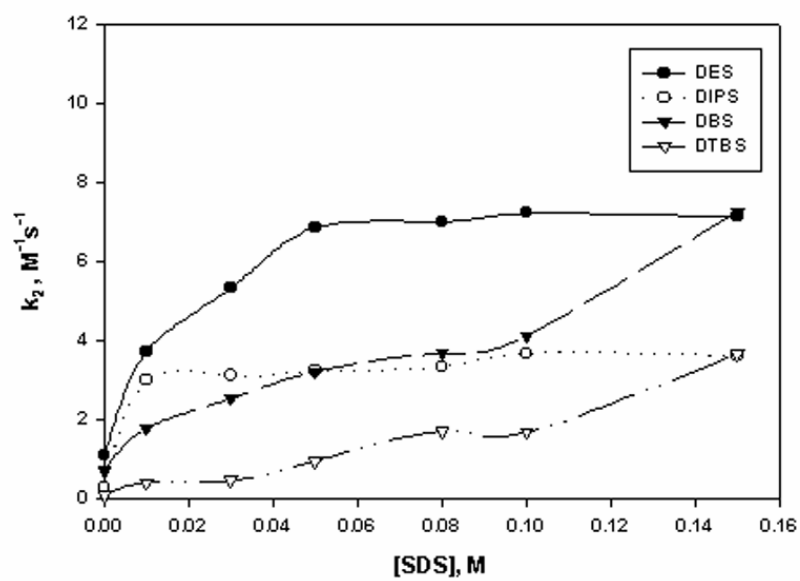

Figure S1 : Variation of rate constant with [SDS] for the reaction of  $[Fe(bpy)_3]^{3+}$  with dialkyl sulfides.

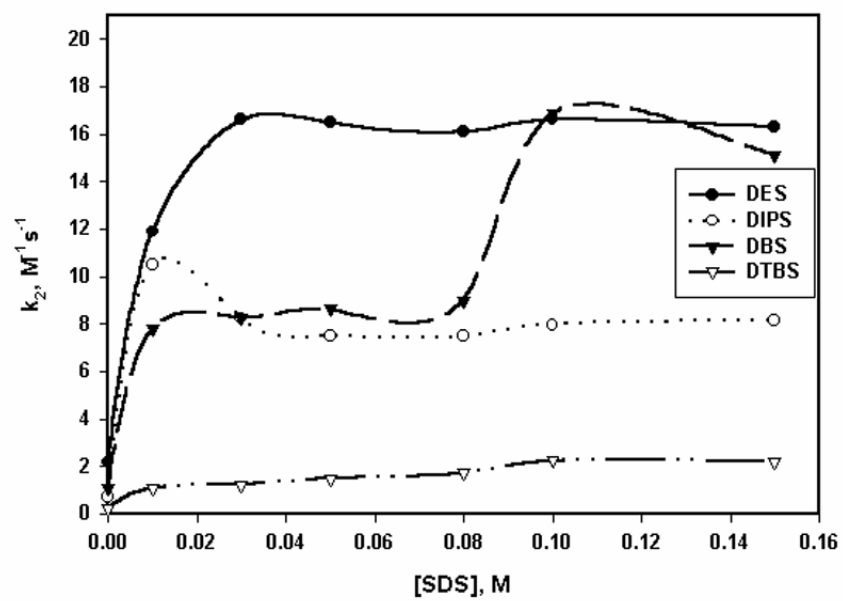

Figure S2 : Variation of rate constant with [SDS] for the reaction of  $[Fe(phen)_3]^{3+}$  with dialkyl sulfides.

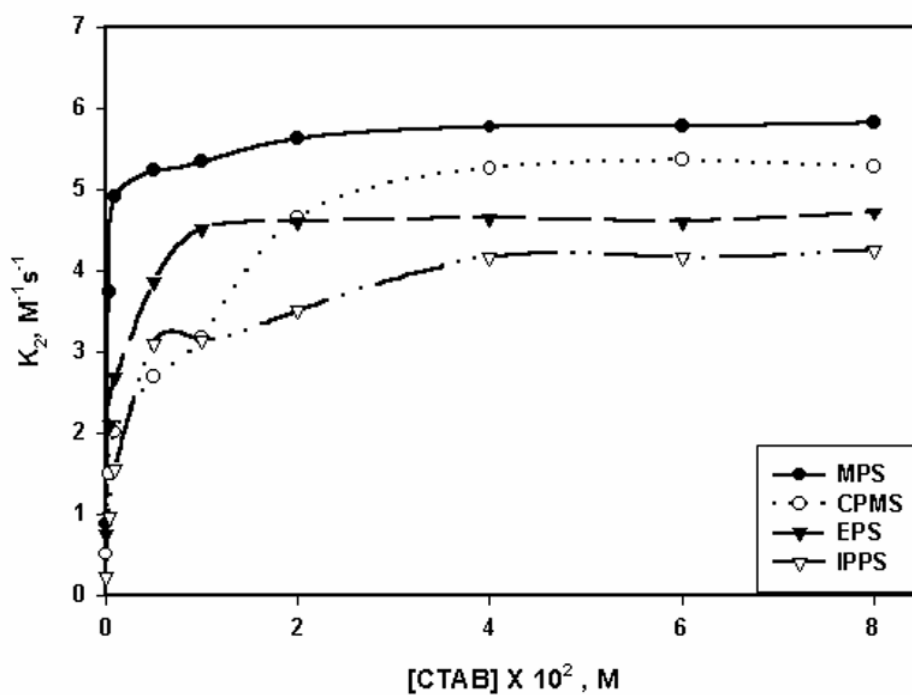

Figure S3 : The change of rate constant with [CTAB] for the reaction of  $[\text{Fe}(\text{phen})_3]^{3+}$  with alkyl aryl sulfides.

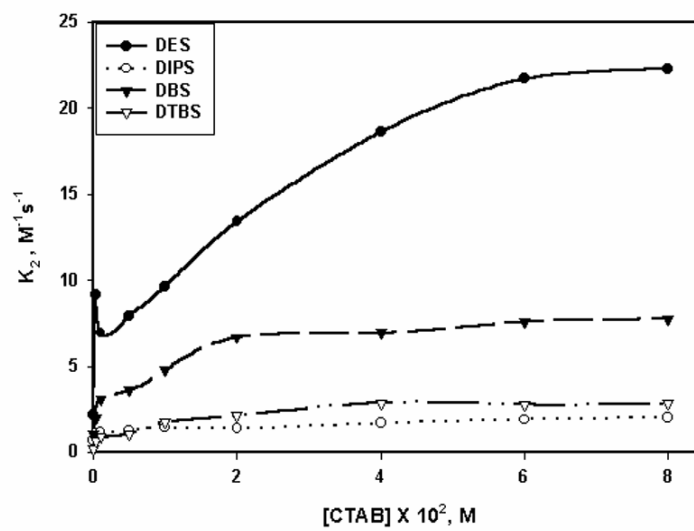

Figure S4. The change of rate constant with [CTAB] for the reaction of  $[Fe(phen_3)^{3+}]$  with dialkyl sulfides.

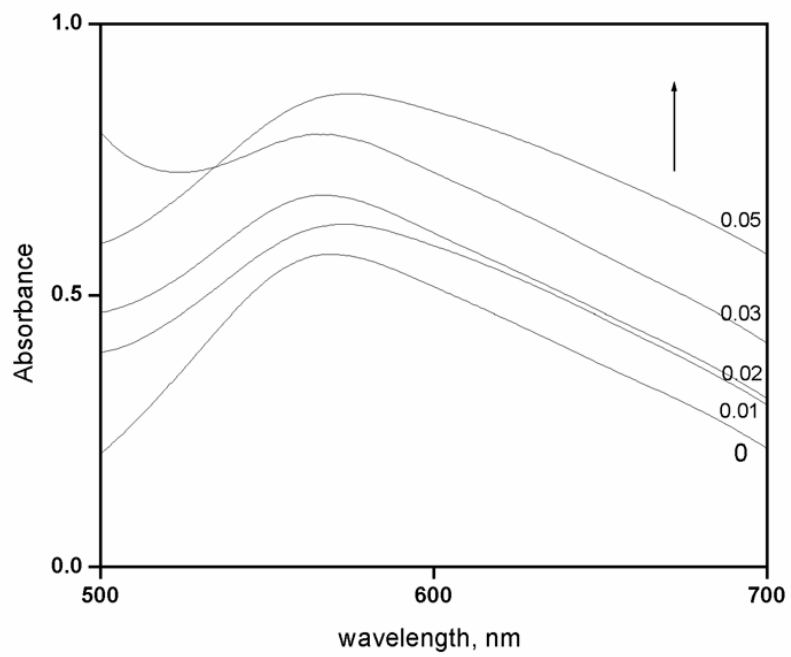

Figure S5. The change in the absorbance of  $[\text{Fe}(\text{phen})_3]^{3+}$  [CTAB].
